# Supplementary material for: A Frailty Instrument for primary care for those aged 75 years or more: findings from the Survey of Health, Ageing and Retirement in Europe, a longitudinal population-based cohort study (SHARE-FI75+)
Source: HighWire-hosted journal article supplement (doi:10.1136/bmjopen-2014-006645), 2014-12-01
Supplement: bmjopen-2014-006645supp_Excel-Calculator.xlsx [file bmjopen-2014-006645supp_Excel-Calculator.xlsx]

## Sheet: Questions
																										Possible Answers (Selections for User)
SHARE-FI75+ FRAILTY CALCULATOR
v1.0 (Interface by Medical Physics & Bioengineering, St James's Hospital, Ireland, 2014)																										Gender	Age	Fatigue	Low Appetite	Weakness	Slowness	Low Physical Activity
GENDER																										Choose..	Choose..	Choose..	Choose..	Choose..	Choose..	Choose..
Are you male or female?	Choose..																									Male	75	Yes	Diminution in desire for food and/or eating less than usual	Yes	Observed walking without help of another person or using support	More than once a week
AGE																										Female	76	No	No change in desire for food and/or eating the same as usual	No	Observed walking with help of another person or using support	Once a week
What age are you (in years)?	Choose..																										77		Increase in desire for food and/or eating more than usual		Not observed - in wheelchair or bedbound	One to three times a month
FATIGUE																											78				Not observed - uncertain if impairment	Hardly ever, or never
In the last month, have you had too little energy to do the things you wanted to do?	Choose..																										79
LOW APPETITE																											80
What has your appetite been like?	Choose..																										81
WEAKNESS Because of a health problem, do you have difficulty (expected to last more than 3 months):																											82
1) getting up from chair after sitting for long periods?	Choose..																										83
2) lifting or carrying weights over 10 pounds/5 kilos, like a heavy bag of groceries?	Choose..																										84
SLOWNESS																											85
To be answered by the examiner: choose one of the following:	Choose..																										86
LOW PHYSICAL ACTIVITY																											87
How often do you engage in activities that require a low or moderate level of energy such as gardening, cleaning the car, or doing a walk?	Choose..																										88
FRAILTY SCORE:	…																										89
FRAILTY CATEGORY:	…																										90
																											91
																											92
																											93
																											94
																											95
																											96
																											97
																											98
																											99
																											100
																											101
																											102
																											103
																											104
																											105
																											106
																											107
																											108
																											109
																											110
																											111
																											112
																											113
																											114
																											115
																											116
																											117
																											118
																											119
																											120
																											121
																											122
																											123
																											124
																											125
																											126
																											127
																											128
																											129
																											130

## Sheet: Calculations
CODING CALCULATIONS
	Questions	Coded Value (from answers)
	Gender	0
	Age	Choose..
	Fatigue	Choose..
	Low Appetite	Choose..
	Weakness	Choose..
	Slowness	Choose..
	Low Physical Activity	Choose..
ALGORITHM VARIABLES
	Variable	Males	Females
	Age	Choose..	Choose..
	Fatigue	Choose..	Choose..
	Low Appetite	Choose..	Choose..
	Weakness	Choose..	Choose..
	Observed Gait1	0	0
	Observed Gait2	0	0
	Observed Gait3	0	0
	Observed Gait4	0	0
	Frequency of Activities	Choose..	Choose..
		*male and female variables above are equal. Just for convenience
ALGORITHM CALCULATION ELEMENTS
	Algorithm Components	Males	Females
	Cluster1	#VALUE!	#VALUE!
	Cluster2	#VALUE!	#VALUE!
	Cluster3	#VALUE!	#VALUE!
	MaxCluster	#VALUE!	#VALUE!
	Cluster1Norm	#VALUE!	#VALUE!
	Cluster2Norm	#VALUE!	#VALUE!
	Cluster3Norm	#VALUE!	#VALUE!
	SumClusters	#VALUE!	#VALUE!
	Cluster1FinalCalc	#VALUE!	#VALUE!
	Cluster2FinalCalc	#VALUE!	#VALUE!
	Cluster3FinalCalc	#VALUE!	#VALUE!
	Dfactor	#VALUE!	#VALUE!
SHARE-FI75+ OUTPUTS (result)
	FRAILTY SCORE	#VALUE!	#VALUE!
	FRAILTY CATEGORY	#VALUE!	#VALUE!

## Sheet: _Options
Yes	Diminution in desire for food and/or eating less than usual	Yes	Yes	Hardly ever, or never
No	No change in desire for food and/or eating the same as usual	No	No	One to three times a month
	Increase in desire for food and/or eating more than usual			Once a week
				More than once a week

## Sheet: _SSC
		{"IsHide":false,"SheetId":0,"Name":"Questions","HiddenRow":0,"VisibleRange":"","SheetTheme":{"TabColor":"","BodyColor":"","BodyImage":""}}	{"ButtonStyle":0,"Name":"","HideSscPoweredlogo":false,"LiveShare":{"Enable":false},"CopyProtect":{"IsEnabled":false,"DomainName":""},"Theme":{"BgColor":"#FFDDD9C3","BgImage":"","InputBorderStyle":1},"Layout":0,"LayoutConfig":{"IsSamePagesHeight":false},"SmartphoneSettings":{"ViewportLock":true,"UseOldViewEngine":false,"EnableZoom":false,"EnableSwipe":false,"HideToolbar":false,"InheritBackgroundCo…	{"Captcha":{"Heading":"Enter the number displayed below.","Message":"This is to verify that you are a human visitor, to prevent automated form submissions.","OkButton":"OK","CancelButton":"Cancel","ErrorMessage":"Your answer is incorrect, please try again."},"RequiredField":{"ErrorMessage":"The fields with the red border are required.","OkButton":"OK","DDLDefaultRequiredText":"Please Select"},"Wi…
		{"IsHide":true,"SheetId":0,"Name":"Calculations","HiddenRow":0,"VisibleRange":"","SheetTheme":{"TabColor":"","BodyColor":"","BodyImage":""}}
		{"IsHide":true,"SheetId":0,"Name":"Sheet1","HiddenRow":0,"VisibleRange":"","SheetTheme":{"TabColor":"","BodyColor":"","BodyImage":""}}
